# Supplementary material for: FAT1 Upregulates in Oral Squamous Cell Carcinoma and Promotes Cell Proliferation via Cell Cycle and DNA Repair
Source: PubMed Central journal article supplement (PMC9130556; doi:10.3389/fonc.2022.870055), 2022-05-11

## Supplementary Data

All the raw data in this manuscript were listed in this file and another excel file. And the uncropped scanned membranes, microscopy images, flow cytometry data, the relevant code/script files and data sheets were deposited in Jianguoyun, which can be found online at:

<https://www.jianguoyun.com/p/Dcy27SEQkr-hChjm9qsE>

The raw data of RNA-sequencing have been deposited in the NCBI gene expression omnibus (GEO) under accession no. GSE196138

(<https://www.ncbi.nlm.nih.gov/geo/query/acc.cgi?acc=GSE196138>).

**Fig2C**

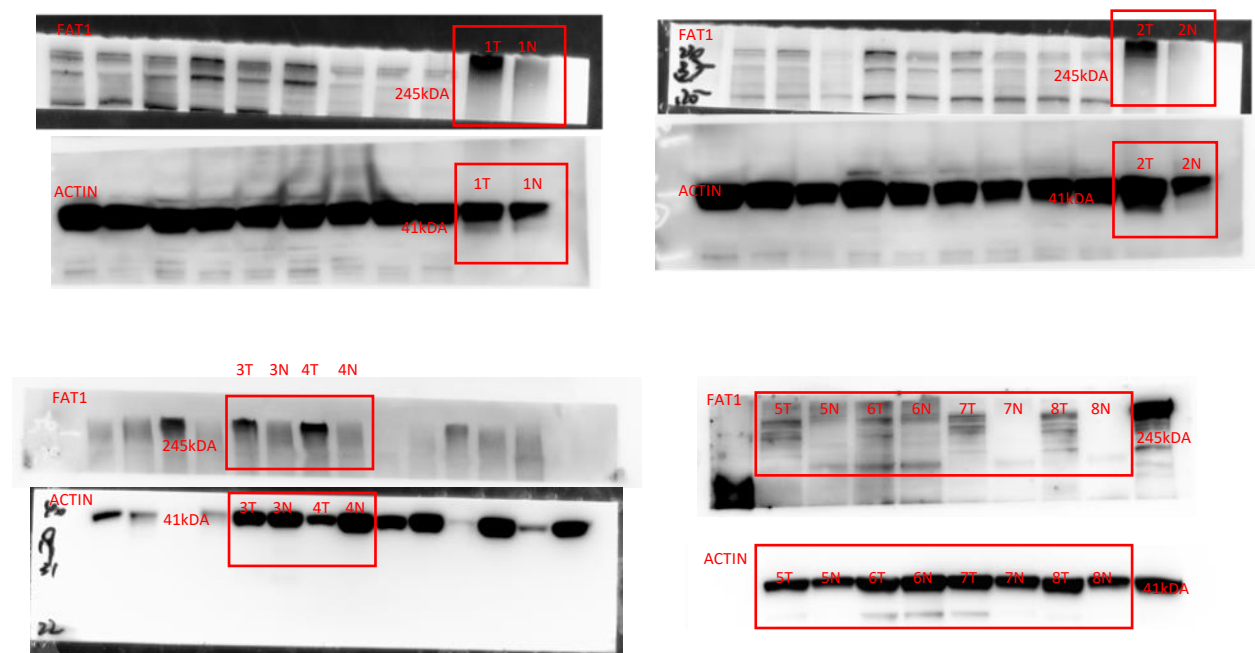

|            |        |        |        |        |        |        |        |        |
|------------|--------|--------|--------|--------|--------|--------|--------|--------|
| sample     | 1T     | 1N     | 2T     | 2N     | 3T     | 3N     | 4T     | 4N     |
| FAT1       | 123647 | 21186  | 113858 | 17597  | 76794  | 32550  | 79497  | 15799  |
| ACTIN      | 311236 | 253617 | 356137 | 253421 | 191457 | 197982 | 136623 | 226158 |
| FAT1/ACTIN | 0.3972 | 0.0835 | 0.3197 | 0.0693 | 0.4011 | 0.1687 | 0.5818 | 0.0698 |
| sample     | 5T     | 5N     | 6T     | 6N     | 7T     | 7N     | 8T     | 8N     |
| FAT1       | 47470  | 11267  | 44208  | 18420  | 44589  | 1053   | 52166  | 1294   |
| ACTIN      | 127272 | 100016 | 140860 | 150689 | 138132 | 120342 | 148991 | 12065  |
| FAT1/ACTIN | 0.3729 | 0.1126 | 0.3134 | 0.0122 | 0.3264 | 0.0087 | 0.3501 | 0.0107 |

Points with image J software

**Fig4B**

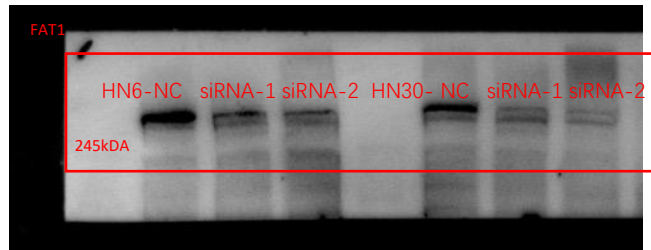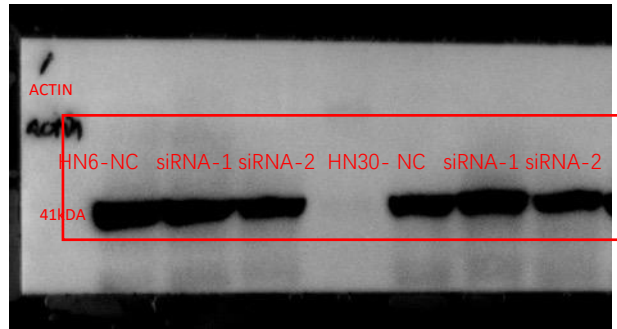

Points with image J software

| Sample     | HN6-NC | HN6-siRNA-1 | HN6-siRNA-2 | HN30-NC | HN30-siRNA-1 | HN30-siRNA-2 |
|------------|--------|-------------|-------------|---------|--------------|--------------|
| FAT1       | 129334 | 64087       | 37645       | 87522   | 42302        | 26067        |
| ACTIN      | 196137 | 208546      | 158328      | 162327  | 181471       | 158251       |
| FAT1/ACTIN | 0.6591 | 0.3073      | 0.2377      | 0.5329  | 0.2696       | 0.1646       |

**Western blot of another independent repeat of silencing FAT1 by siRNA**

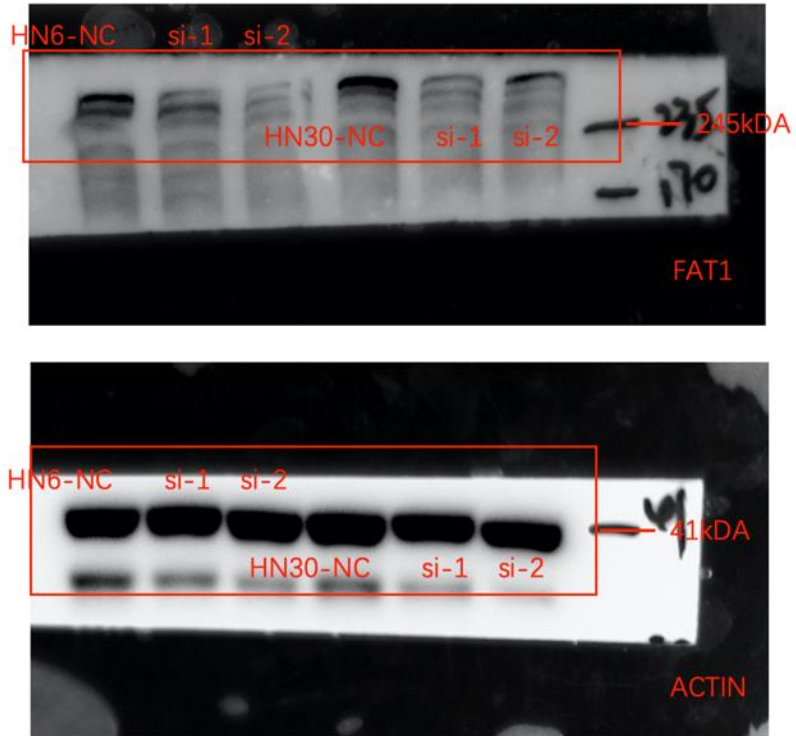

Points with image J software

| Sample     | HN6-NC | HN6-siRNA-1 | HN6-siRNA-2 | HN30-NC | HN30-siRNA-1 | HN30-siRNA-2 |
|------------|--------|-------------|-------------|---------|--------------|--------------|
| FAT1       | 40310  | 23536       | 13154       | 41497   | 20355        | 25310        |
| ACTIN      | 105523 | 106735      | 110388      | 120596  | 114893       | 113293       |
| FAT1/ACTIN | 0.382  | 0.221       | 0.120       | 0.344   | 0.177        | 0.223        |

**Fig4D**

**Number of clones**

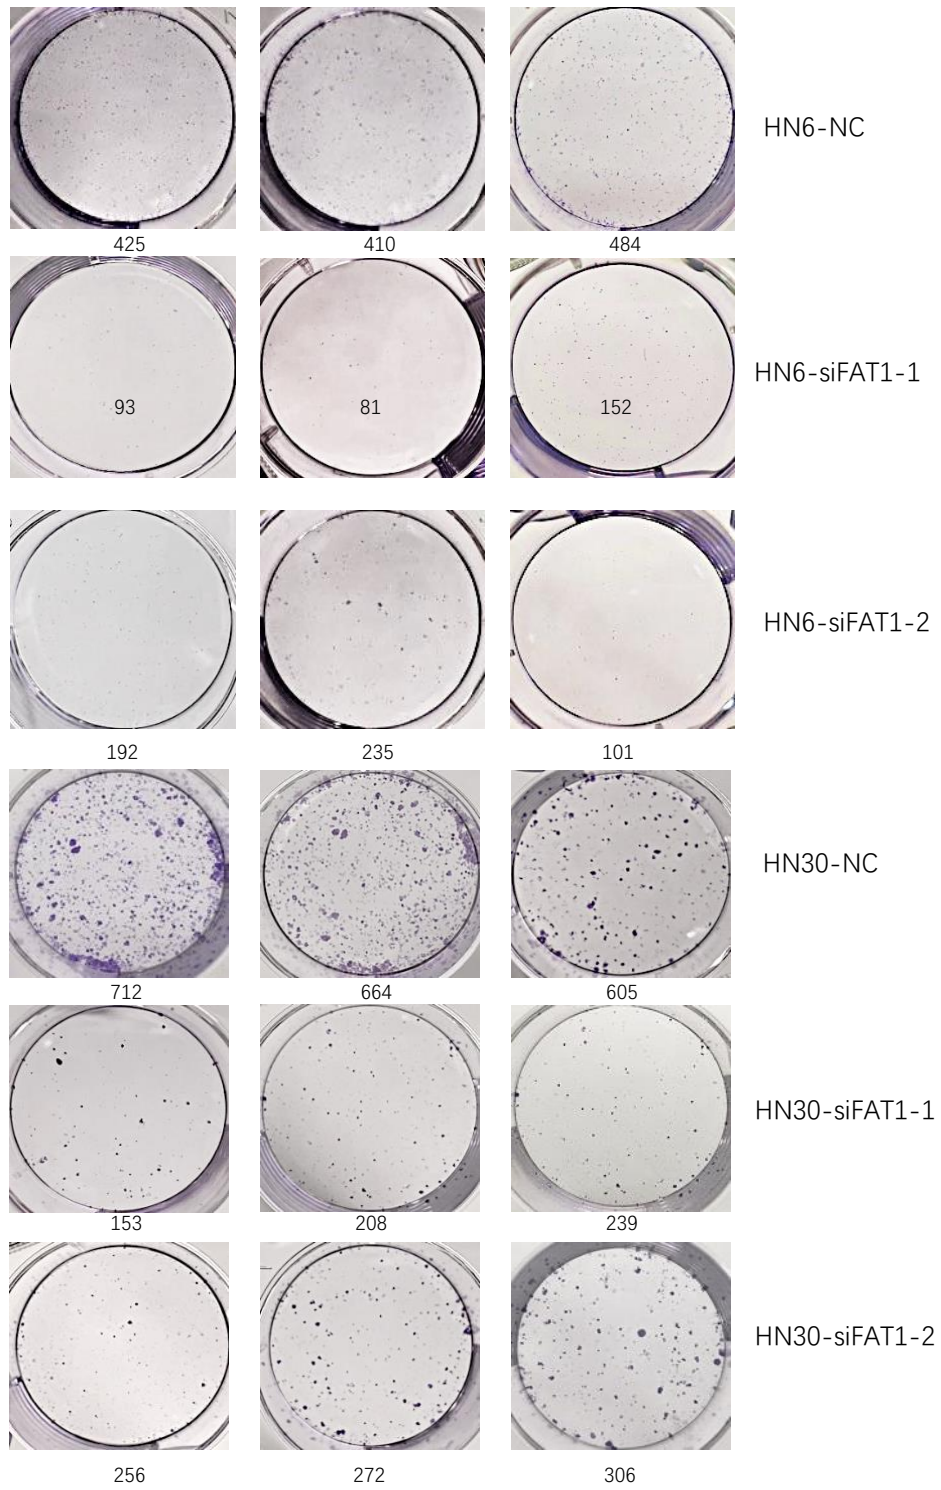

**Number of clones of another independent repeat clone formation assay of HN6**

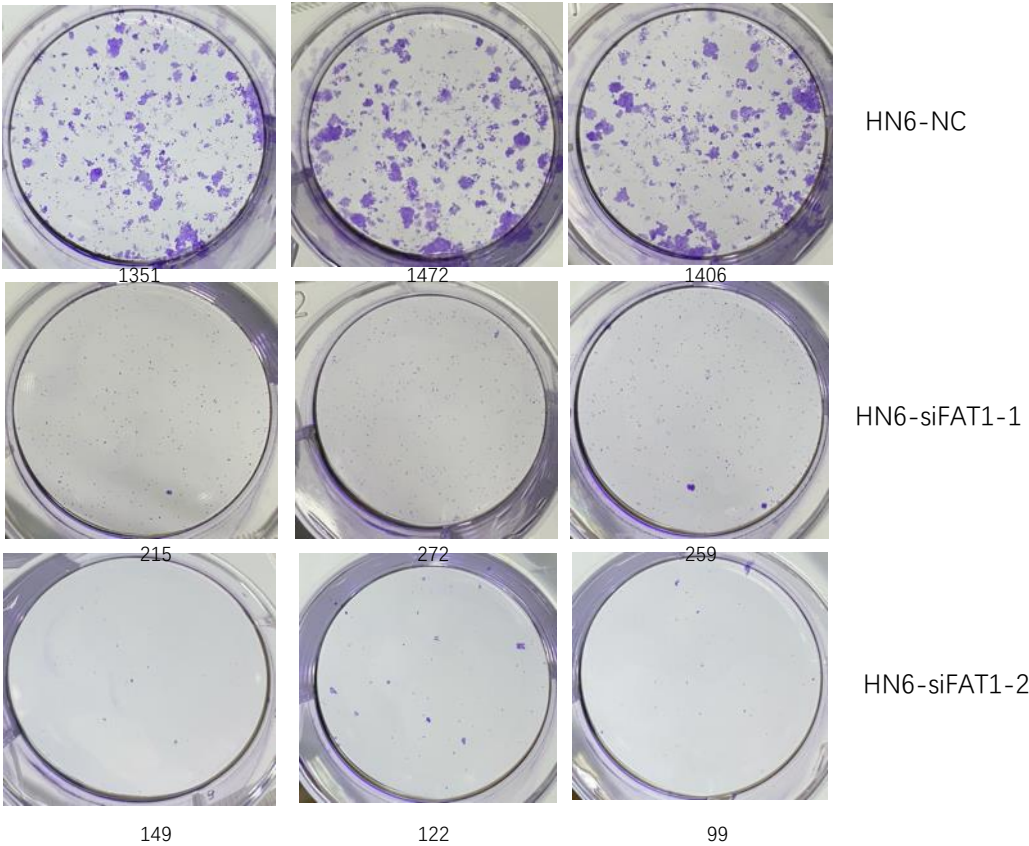

**Fig4E**

**For HN6 cells**

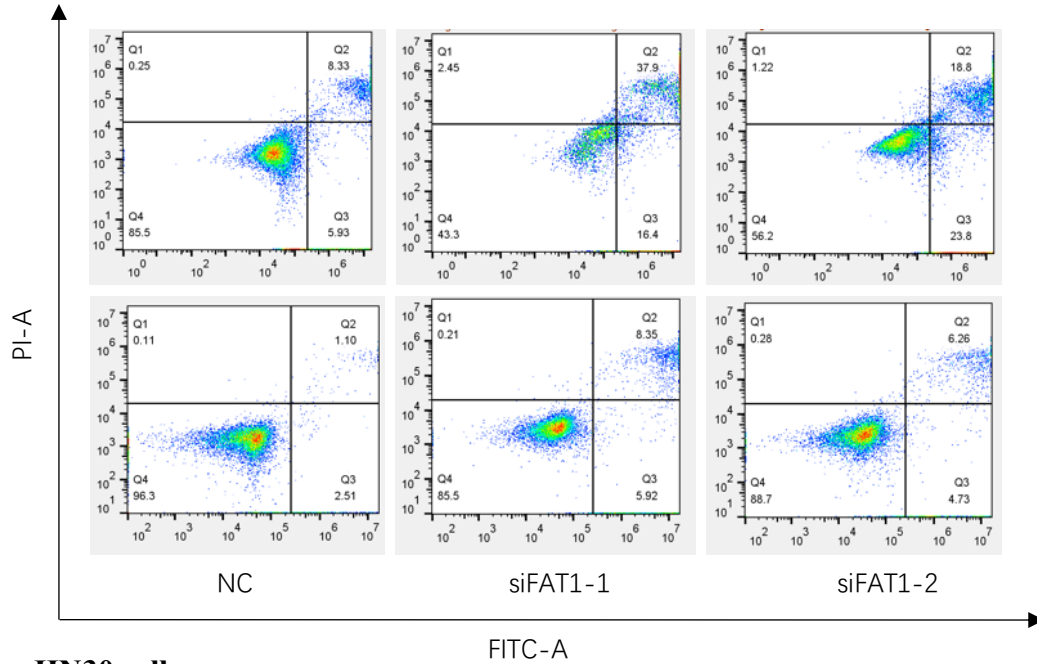

**For HN30 cells**

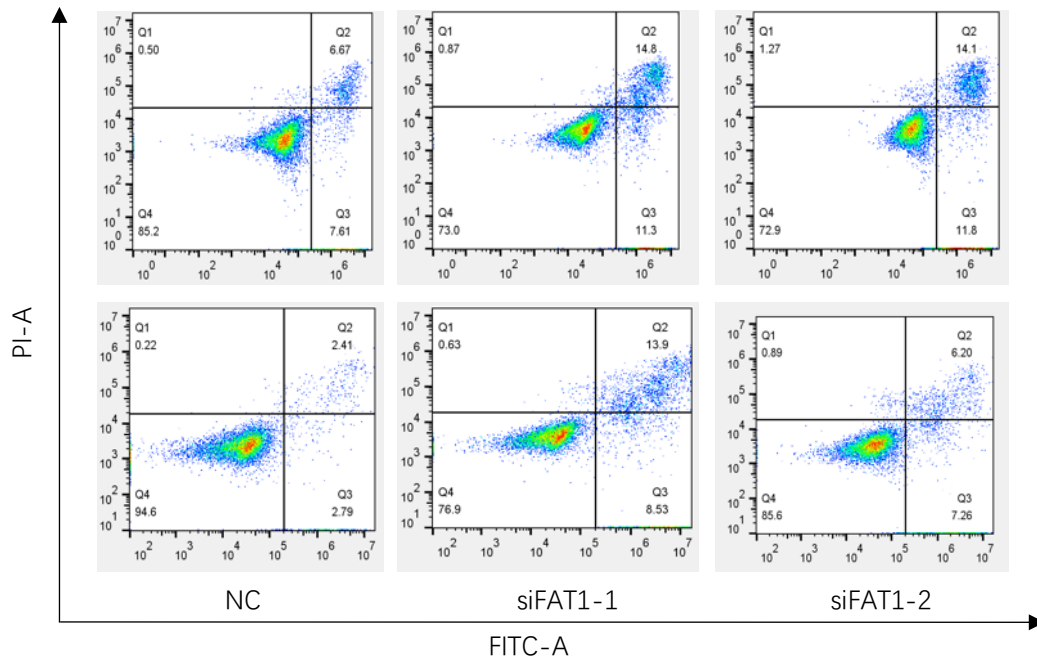



**Fig4F**

**For HN6 cells**

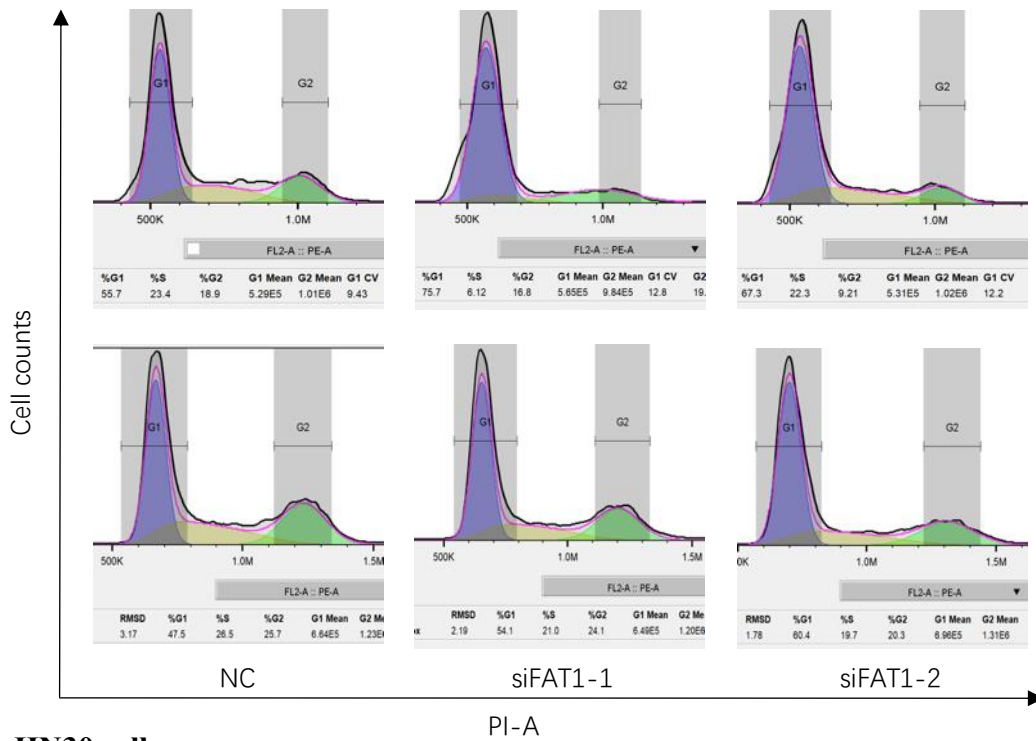

**For HN30 cells**

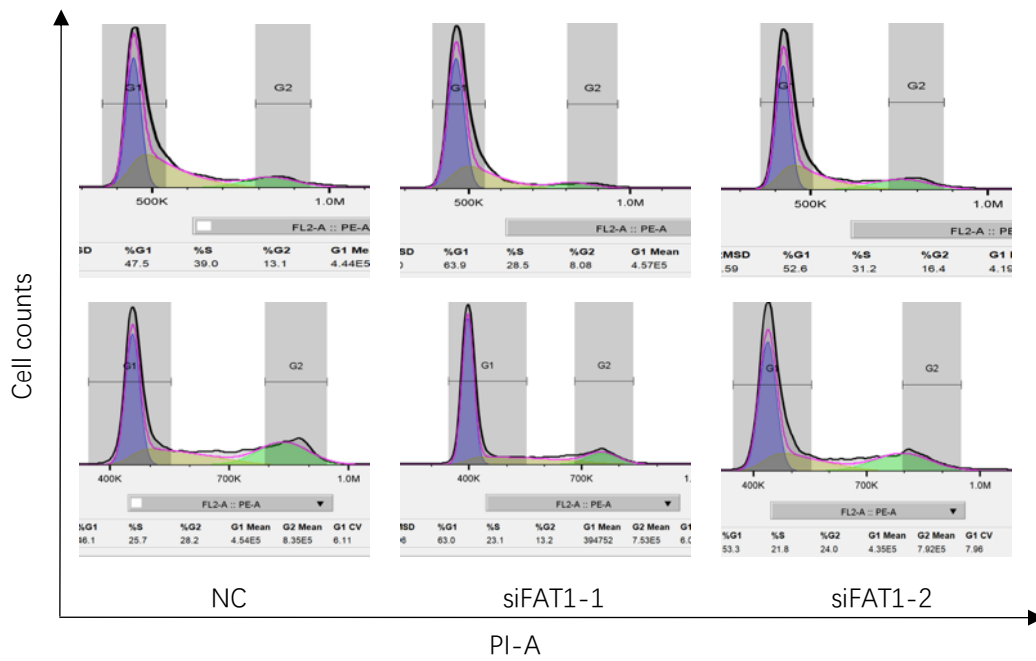

**Fig4G**

**For HN30 cells**

|       | NC | siRNA-1 | siRNA-2 |
|-------|----|---------|---------|
| Core1 | 53 | 17      | 28      |
| Core2 | 57 | 20      | 30      |
| Core3 | 45 | 18      | 34      |

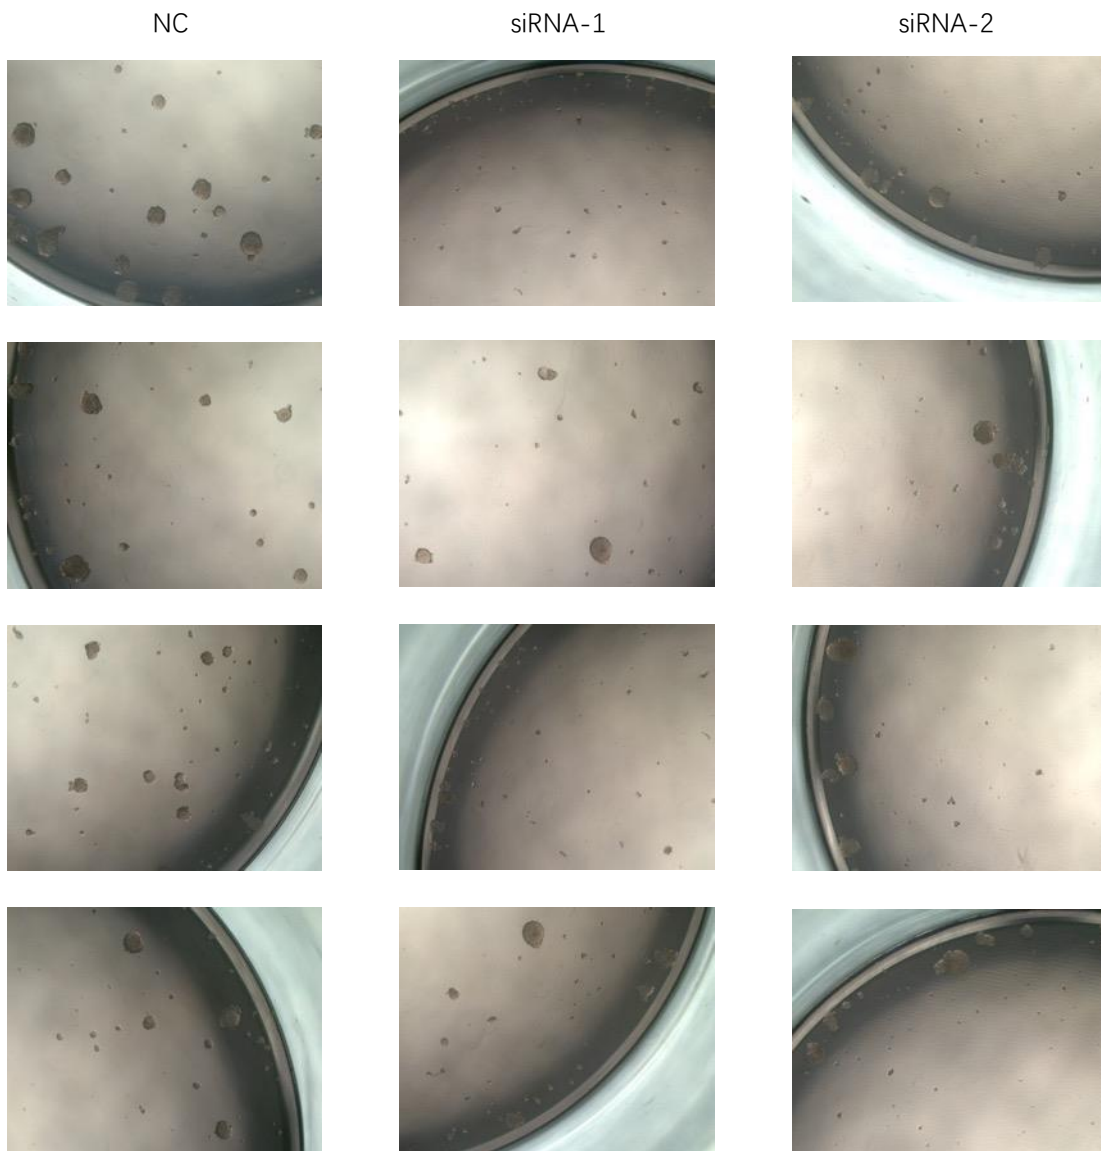



Photos of another independent repeat formation assay of HN30

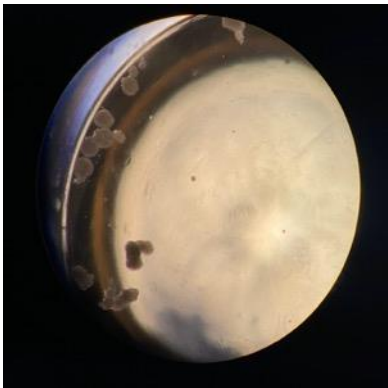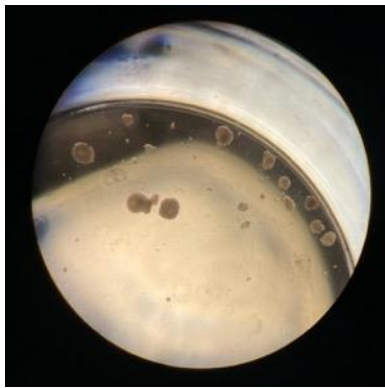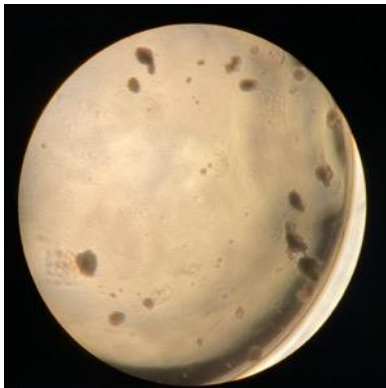

NC

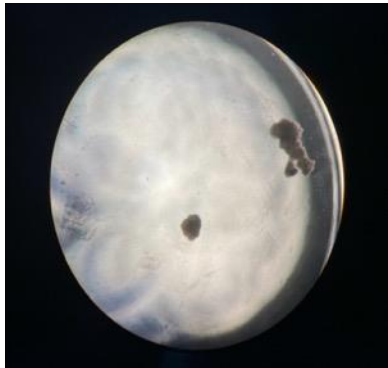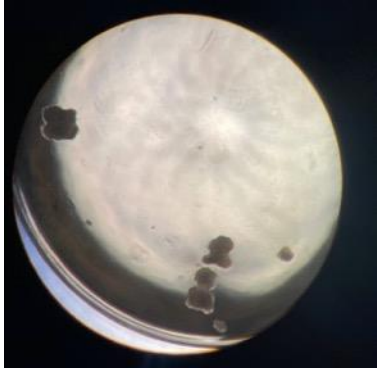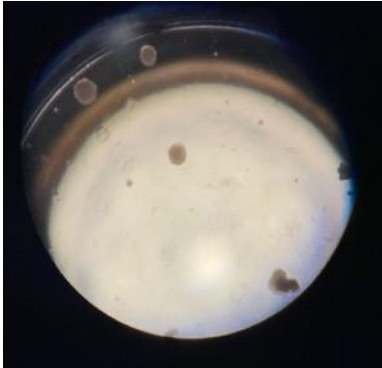

siFAT1-1

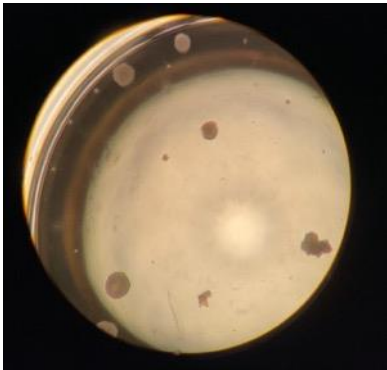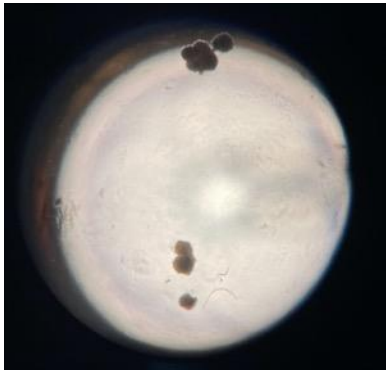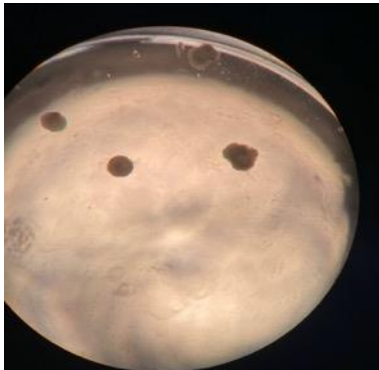

siFAT1-2

**Fig5A**

**The full visual filed of transwell chambers of HN6 and HN30**

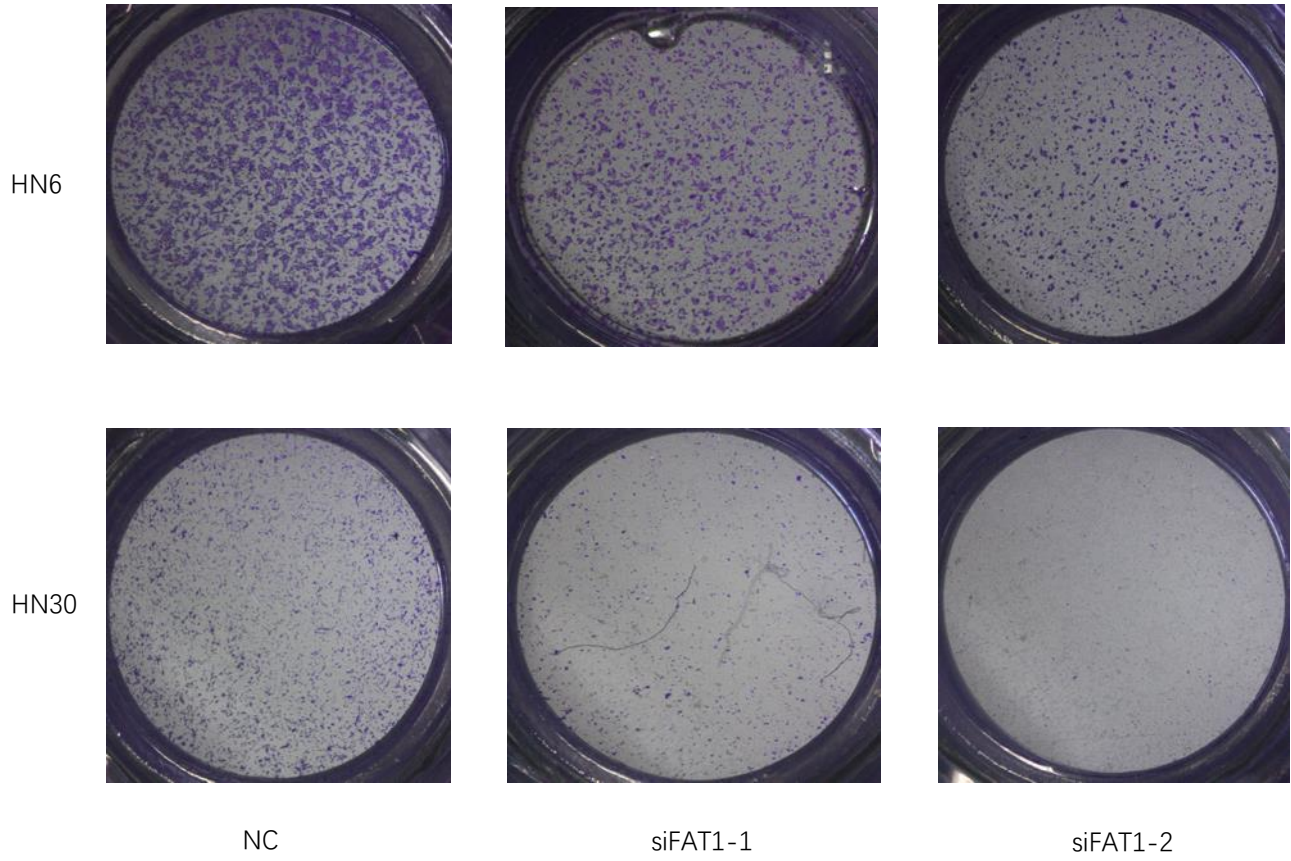



**For HN6 cells**

**Number of migration cells**

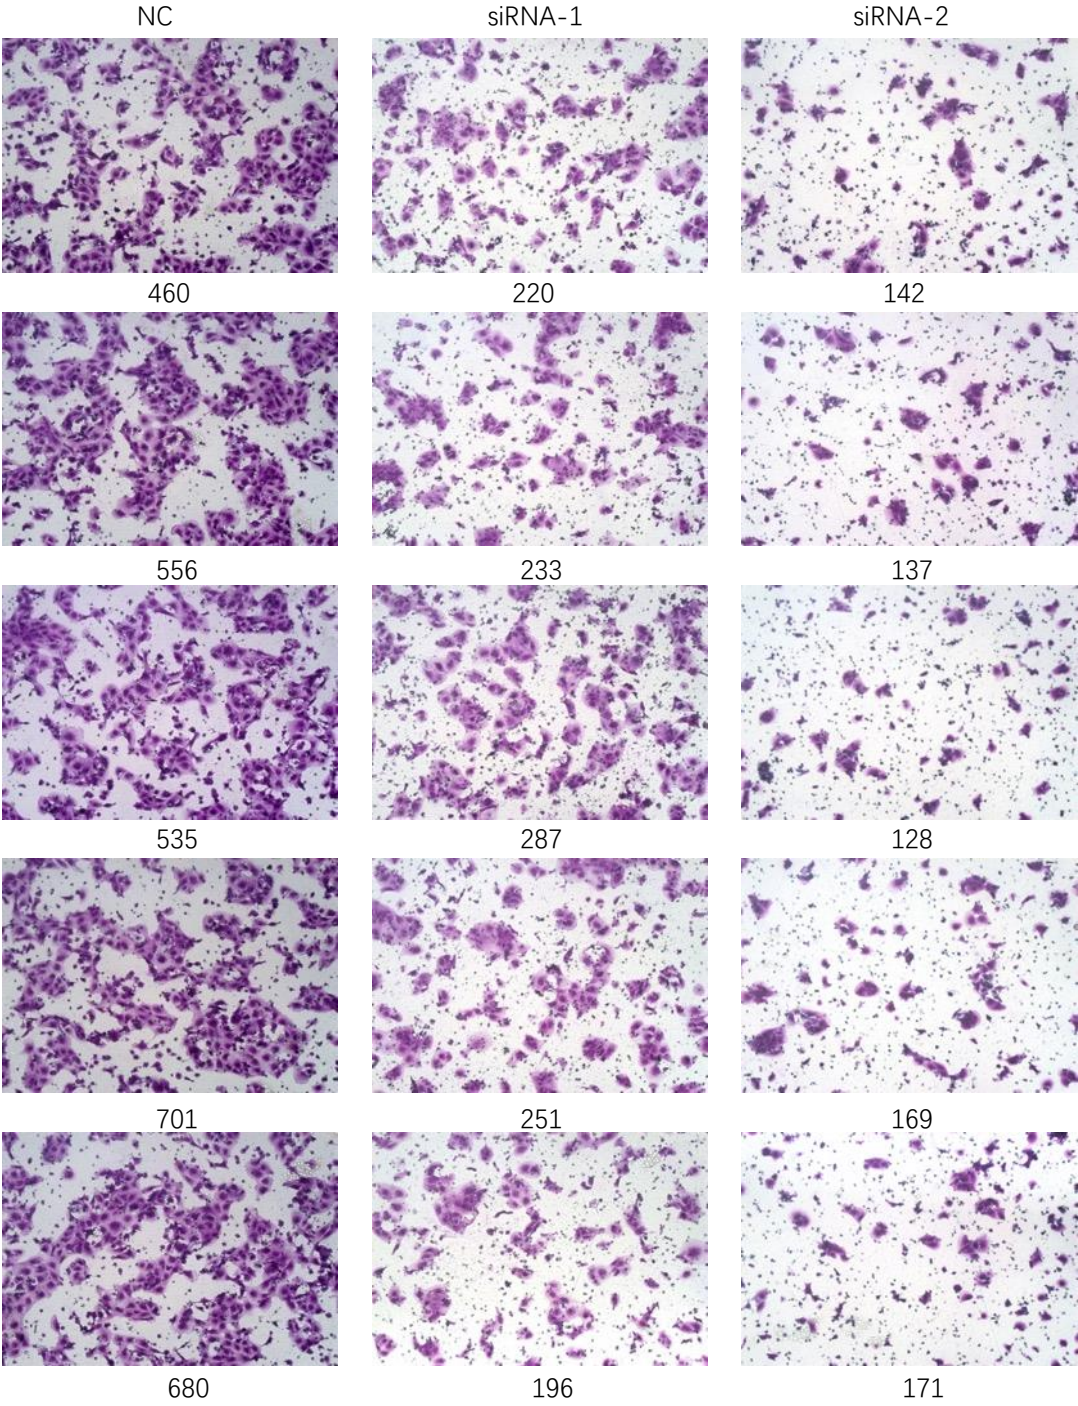



**For HN30 cells**

**Number of migration cells**

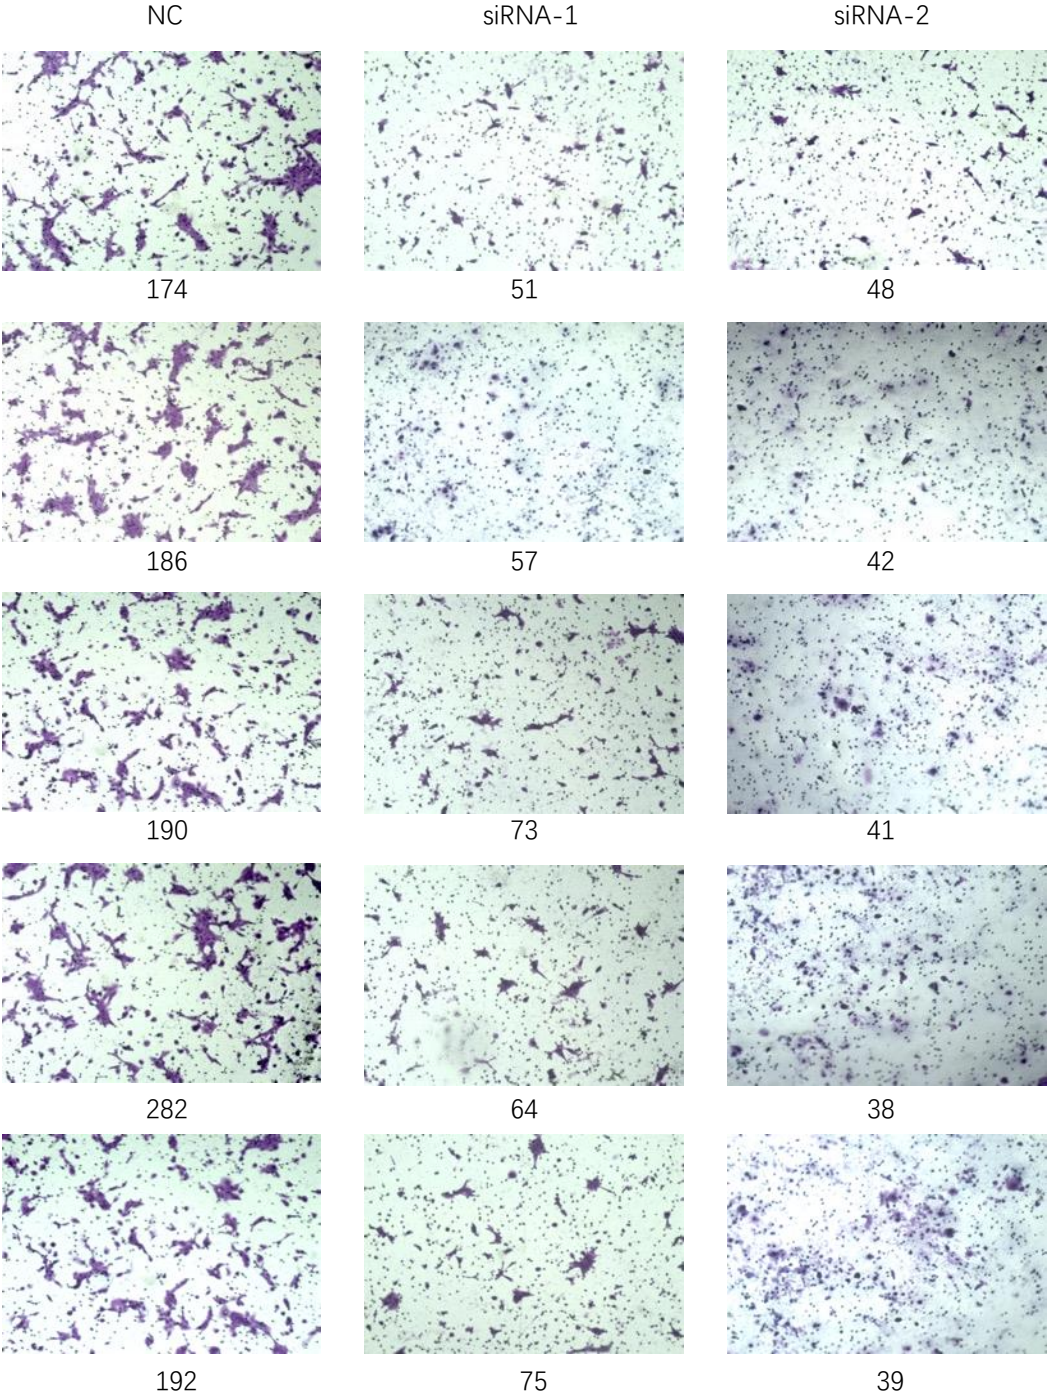

**Fig 5B**

**For HN6 cells**

**Percentage of closure (calculated with image J software)**

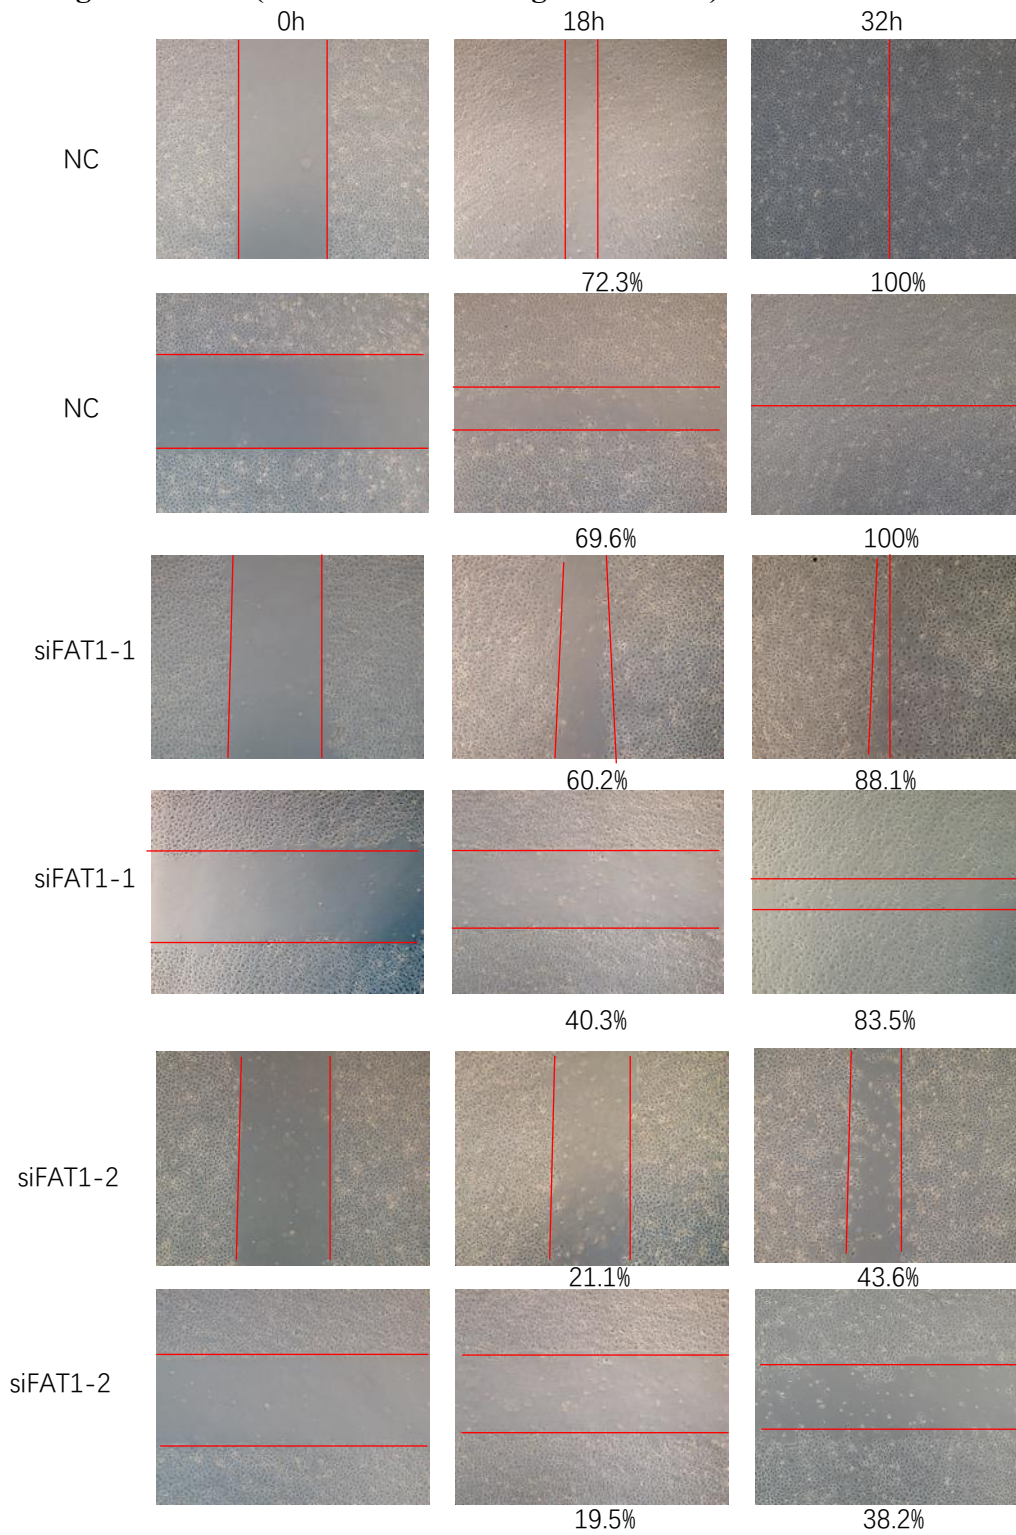



**For HN30 cells**

**Percentage of closure (calculated with image J software)**

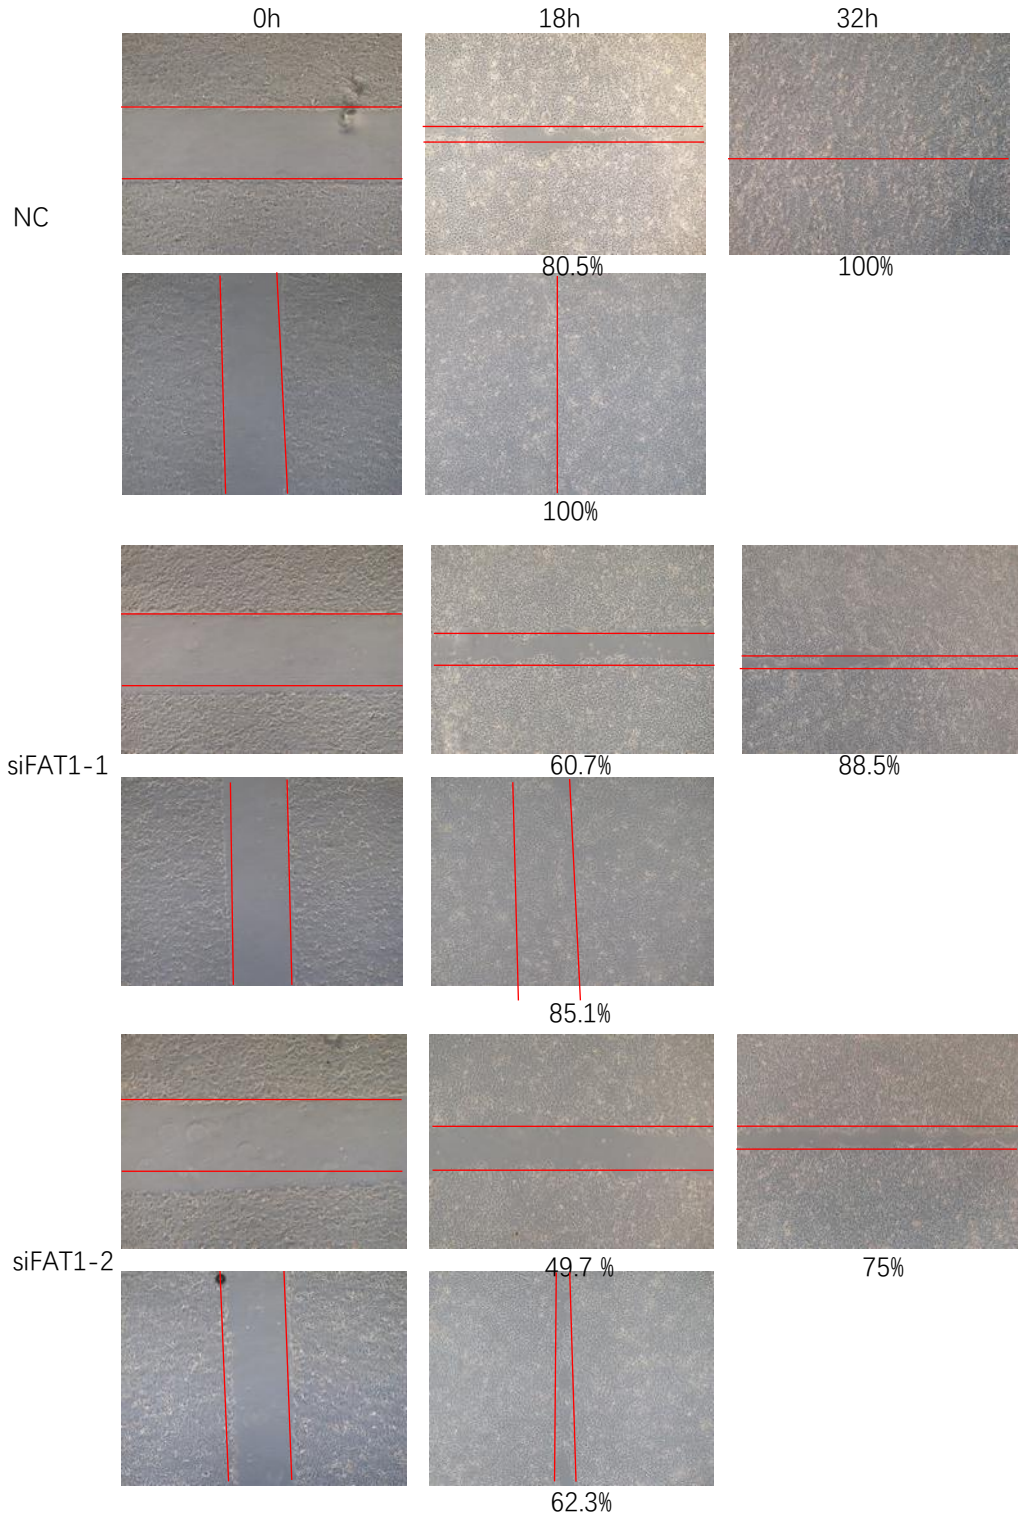

Supplement: DataSheet_1.pdf [file DataSheet_1.pdf]
